# Supplementary material for: Rapid Genome Evolution and Adaptation of Thlaspi arvense Mediated by Recurrent RNA-Based and Tandem Gene Duplications
Source: Front Plant Sci. 2022 Jan 4;12:772655. doi: 10.3389/fpls.2021.772655 (PMC8764390; doi:10.3389/fpls.2021.772655)
Supplement: Supplementary file 2 [file Data_Sheet_2.xlsx]

## Sheet: Table S1
Table S1 41k-mer distributions of T. arvense genome final assembly by GnomeScope.
Property	Estimated contents	Percentages
Heterozygosity	0.000429196	NA
Genome Haploid Length	487,200,540 bp	1
Genome Repeat Length	203,303,116 bp	0.4173
Genome Unique Length	283,897,425 bp	0.5827

## Sheet: Table S2
Table S2 Summary of processesing the genome assemblie of T. arvense.
Content	Software	Number	N50 (Mb)	Genome size (Mb)	Rate of N
Contig assembly	CANU	954	2.36	454.55	0
Polishing	Arrow	954	2.36	454.69	0
Polishing	Pilon	954	2.36	454.54	0
Sscaffold assembly	Sovle	529	34.87	466.1	0.025
Constructing pseudomolecules	Lachesis	170	56.83	467.28	0.029
Filling gaps	Pbjelly	170	58.57	480.04	0.025
Polishing	Arrow	170	58.32	477.81	0.021
Polishing	Pilon	170	59.1	486.27	0.016

## Sheet: Table S3
Table S3 Comparision of genome features of T. arvense between three versions of genome assemblies.
Genome features of T. arvense	version of the assembly published in 2015*	version of the assembly published in 2021※	version of our assembly in this study.
Genome sequencing technologies	Illumina HiSeq paire end (33.19 Gb); PacBio SMRT (0.21 Gb); Illumina HiSeq Mate Pair (9.55 Gb); Illumina MiSeq (4.49 Gb).	Illumina Hiseq paire end(76.63 Gb); Oxford Nanopore (55.26 Gb); Hi-C (60.97 Gb).	Illumina HiSeq paire end(23.50 Gb); PacBio SMRT (27.99 Gb); Bionano (4.60 Gb); Hi-C (32.30 Gb).
Total length of contigs (Mb)	325.3	527.15	454.54
Total number of contigs	44109	3790	954
Length of contig N50 (Mb)	0.02	4.18	2.36
Total length of scaffolds (Mb)	343.01	527.3	467.28
Number of scaffolds	6768	2298	170
Length of scaffold N50 (Mb)	0.14	70.79	59.1
Total assembly size (Mb)	412.25	527.3	486.27
Number of pseudochromosomes	NA	7	7
Total anchored size (Mb)	343.01	474.97	482.92
Anchoring rate (%)	83.2044	90.0759	99.3111
GC content	0.38	0.39	0.39
Number of predicted genes	27390	31596	36556
BUSCO assessment (%)	NA	95.9	94.58
Repeat content (%)	24.38	70.19	65.86
Retrotransposons content (%)	20.94	67.57	57.92
LTR-retrotransposons content (%)	NA	62.13	56.94
DNA transposons (%)	1.6	2.62	2.2
*Dorn, K. M., J. D. Fankhauser, D. L. Wyse and M. D. Marks (2015). "A draft genome of field pennycress (Thlaspi arvense) provides tools for the domestication of a new winter biofuel crop." DNA Research 22(2): 121-131.
※Geng, Y., Y. Guan, Qiong, S. Lu, M. An, M. J. C. Crabbe, J. Qi, F. Zhao, Q. Qiao and T. Zhang (2021). "Genomic analysis of field pennycress (Thlaspi arvense) provides insights into mechanisms of adaptation to high elevation." BMC Biol 19(1): 143.

## Sheet: Table S4
Table S4 Summary of gene number and exon number of genome and each chromosome of T. arvense.
Sequences	Length (Mb)	Ratio of whole assembly	GC	Gene number	Exon number	Exon number per gene
Whole assembly	486.27	1	0.39	36556	163014	4.46
Chr1	133.83	0.2752	0.37	17368	86308	4.97
Chr2	74.24	0.1527	0.39	5492	24998	4.55
Chr3	59.04	0.1214	0.4	2200	7575	3.44
Chr4	59.1	0.1215	0.38	5245	23029	4.39
Chr5	55.97	0.1151	0.39	2472	8541	3.46
Chr6	54.8	0.1127	0.39	2390	8289	3.47
Chr7	45.94	0.0945	0.4	1247	3942	3.16
Total/avg	482.92	0.9931	\	36414	162682	4.47

## Sheet: Table S5
Table S5 Summary of BUSCO analysis about T. arvens genome assembly.
	Total BUSCO groups searched	Complete single-copy BUSCOs	Complete duplicated BUSCOs	Fragmented BUSCOs	Missing BUSCOs	Complete BUSCOs Percentage (%)
T.arvens genome	1440	1279	83	23	55	94.6

## Sheet: Table S6
Table S6 General statistics of of predicted protein-coding genes of T. arvense genome.
	Genes	ORF (cds)	Exon	Intron
length /bp	68064806	37940610	37940699	30124107
average length /bp	1861.93	1037.88	232.75	308.13
number	36556	36556	163014	97763

## Sheet: Table S7
Table S7 Functional annotation of predicted genes in T. arvense genome.
Annotation database	Number of annotated genes	Percentage of all predicated genes
Swissprot	23043	0.6303
refseq	31039	0.8491
interpro	23203	0.6347
Pfam	23429	0.641
GO	14505	0.3968
Total	31079	0.8502

## Sheet: Table S8
Table S8 Types of whole genome gene duplication in T. arvense genome.
Type of duplication	Number	Percentage
Singleton	12736	0.3484
Dispersed	12108	0.3312
WGD or segmental	4457	0.1219
Proximal	3778	0.1033
Tandem	3477	0.0951
Total	36556	1

## Sheet: Table S9
Table S9 Number changes of types of duplicated genes of T. arvense genome over time.
Time	Total number	Dispersed	WGD/segmental	Proximal	Tandem
Ks <= 0.05	1469	401	113	498	457
		0.273	0.0769	0.339	0.3111
0.05 < Ks < 0.5	6076	2425	365	1450	1836
		0.3991	0.0601	0.2386	0.3022
0.5 < Ks < =1.75	10522	3427	3658	1451	1986
		0.3257	0.3477	0.1379	0.1887
Ks > 1.75	12843	6757	2722	1494	1870
		0.5261	0.2119	0.1163	0.1456

## Sheet: Table S10
Table S10 Comparison of orthogroups of four Brassicaceae species.
Species	Expanded orthogroups	Significantly expanded orthogroups	Contracted orthogroups	Significantly contracted orthogroups	No change orthogroups
Arabidopsis lyrata	2490	326	2864	19	18985
Arabidopsis thaliana	4627	135	1914	31	17798
Eutrema salsugineum	2453	103	2893	51	18993
Thlaspi arvense	2874	345	5006	24	16459

[truncated: 12 more sheets: Table S11, Table S12, Table S13, Table S14, Table S15, Table S16, Table S17, Table S18, Table S19, Table S20, Table S21, Table S22]
